# Supplementary material
Source: publisher figshare collection journal article supplement (https://acs.figshare.com/ndownloader/files/24165980)
Supplement: Supplementary file 3 [file 24165980]

# Supporting Information **NEXMD Software Package** for **Non-adiabatic Excited State Molecular** **Dynamics Simulations**

Walter Malone,<sup>†</sup> Benjamin Nebgen,<sup>‡</sup> Alexander White,<sup>‡</sup> Yu Zhang,<sup>‡</sup> Huajing Song,<sup>‡</sup> Josiah A. Bjorgaard,<sup>‡</sup> Andrew E. Sifain,<sup>¶</sup> Beatriz Rodriguez-Hernandez,<sup>§</sup> Victor M. Freixas,<sup>§</sup> Sebastian Fernandez-Alberti,<sup>§</sup> Adrian E. Roitberg,<sup>||</sup> Tammie R. Nelson,<sup>\*,‡</sup> and Sergei Tretiak<sup>\*,⊥</sup>

<sup>†</sup>*Physics and Chemistry of Materials, Theoretical Division, Los Alamos National Laboratory, Los Alamos, NM, 87545, United States and Center for Nonlinear Studies, Los Alamos National Laboratory, Los Alamos, NM, 87545, United States*

<sup>‡</sup>*Physics and Chemistry of Materials, Theoretical Division, Los Alamos National Laboratory, Los Alamos, NM, 87545, United States*

<sup>¶</sup>*U.S. Army Research Laboratory, Aberdeen Proving Ground, MD 21005, USA*

<sup>§</sup>*Universidad Nacional de Quilmes/CONICET, Roque Saenz Peña 352, B1876BXD Bernal, Argentina*

<sup>||</sup>*Department of Chemistry, University of Florida, Gainesville, Florida 32611, USA*

<sup>⊥</sup>*Physics and Chemistry of Materials, Theoretical Division, Los Alamos National Laboratory, Los Alamos, NM, 87545, United States and Center for Integrated Nanotechnologies, Los Alamos National Laboratory, Los Alamos, NM, 87545, United States*

E-mail: [tammien@lanl.gov](mailto:tammien@lanl.gov); [serg@lanl.gov](mailto:serg@lanl.gov)

**Table S 1: NEXMD output files generated at each verbosity level for each functionality.  $\diamond$  denotes an output file that is only generated for an excited state calculation.**

| Verbosity | File                         | Geometry<br>Optimization (GS<br>or ES) | Single<br>Point (GS<br>or ES) | Adiabatic<br>BOMD<br>(GS or ES) | NAMD |
|-----------|------------------------------|----------------------------------------|-------------------------------|---------------------------------|------|
| 0         | coefficient.out              | $\diamond$                             |                               |                                 | X    |
|           | coords.xyz                   | X                                      | X                             | X                               | X    |
|           | energy-ev.out                | X                                      | X                             | X                               | X    |
|           | restart.out                  |                                        |                               | X                               | X    |
|           | hops.out                     |                                        |                               |                                 | X    |
|           | temperature.out              |                                        |                               | X                               | X    |
|           | velocity.out                 | X                                      | X                             | X                               | X    |
| 1         | coeff-n.out                  | $\diamond$                             |                               |                                 | X    |
|           | nacr.out                     |                                        |                               |                                 | X    |
|           | nact.out                     |                                        |                               |                                 | X    |
|           | pes.out                      | $\diamond$                             | $\diamond$                    | $\diamond$                      | X    |
|           | transition-<br>densities.out | $\diamond$                             | $\diamond$                    | $\diamond$                      | X    |
| 2         | cross-steps.out              |                                        |                               |                                 | X    |
|           | hops-trial.out               |                                        |                               |                                 | X    |
|           | order.out                    |                                        |                               |                                 | X    |
| 3         | cm.out                       | X                                      | X                             | X                               | X    |
|           | coeff-q.out                  |                                        |                               |                                 | X    |
|           | forces.out                   | X                                      | X                             | X                               | X    |

**Table S 2: Description of each file written for different NEXMD verbosity levels.**

| Verbosity | File                     | Description                                                                                                                                                            |
|-----------|--------------------------|------------------------------------------------------------------------------------------------------------------------------------------------------------------------|
| 0         | coefficient.out          | quantum populations (unitless)                                                                                                                                         |
|           | coords.xyz               | atomic cartesian coordinates ( $\text{\AA}$ )                                                                                                                          |
|           | energy-ev.out            | kinetic energy (eV), potential energy (eV), total energy (eV), and their respective changes from t=0 (eV)                                                              |
|           | restart.out              | coordinates ( $\text{\AA}$ ), velocity ( $\text{\AA}/\text{ps}$ ), quantum coefficients and phases, current state, current time, and random seed at the last time step |
|           | hops.out                 | hop type, state before hop, state after hop, total energy before hop (Hartrees), total energy after hop (Hartrees)                                                     |
|           | temperature.out          | temperature (K), temperature of thermostat (K)                                                                                                                         |
|           | velocity.out             | velocity (XYZ) of each atom ( $\text{\AA}/\text{ps}$ )                                                                                                                 |
| 1         | coeff-n.out              | current state, quantum coefficients of all states, and their sum (unitless)                                                                                            |
|           | nacr.out                 | nonadiabatic coupling vector for each atom ( $1/\text{\AA}$ )                                                                                                          |
|           | nact.out                 | nonadiabatic coupling scalar between each state ( $1/\text{ps}$ )                                                                                                      |
|           | pes.out                  | potential energy of each adiabatic state (eV)                                                                                                                          |
|           | transition-densities.out | diagonal elements of the transition density for each atomic orbital in the current state (unitless)                                                                    |
| 2         | cross-steps.out          | overlap of states that may cross (unitless)                                                                                                                            |
|           | hops-trial.out           | lists of all attempted hops and states involved                                                                                                                        |
|           | order.out                | order of adiabatic states with respect to the initial ordering at t=0                                                                                                  |
| 3         | cm.out                   | coordinates of the center of mass with respect to t=0 ( $\text{\AA}$ )                                                                                                 |
|           | coeff-q.out              | phase of each quantum coefficient                                                                                                                                      |
|           | forces.out               | forces (XYZ) on each atom ( $\text{eV}/\text{\AA}$ )                                                                                                                   |
