# Supplementary material
Source: publisher figshare collection journal article supplement (https://acs.figshare.com/ndownloader/files/24165980)
Supplement: Supplementary file 6 [file 24165980]

```

&qmmm
!***** Geometry Optimization
maxcyc=0, ! Number of cycles for geometry optimization [0]
ntpr=1, ! Print results every ntpr cycles [1]
grms_tol=0.0001, ! Tolerance in eV/A (derivatives) [1.0d-2]

!***** Ground-State and Output Parameters
qm_theory='AM1', ! Integral type, check Amber's SQM for more options [AM1]
scfconv=1.0d-8, ! Ground-state SCF convergence criteria, eV [1.0d-6]
verbosity=5, ! QM/MM output verbosity (0-minimum, 5-maximum)
printcharges=0, ! Print (1) or do not print (0) Mulliken charges of QM atoms [0]
! [1 for dynamics and optimization, 5 for others]
printdipole=2, ! (0) Unrelaxed transitions, (1) Unrelaxed transitions plus
! total molecular, or (2) Unrelaxed/relaxed transitions plus
! total molecular [1 for dynamics, 2 for optimization and single-point]
itrmax=300, ! Max SCF iterations for ground state
! (negative to ignore convergence) [300]

!***** Excited-State Parameters
exst_method=1, ! CIS (1) or RPA (2) [1]
dav_guess=1, ! Restart Davidson from (0) Scratch, (1) Previous,
ftol=1.0d-7, ! Acceptance tolerance (|emin-eold|) [1.0d-5]
dav_maxcyc=200, ! Max cycles for Davidson diagonalization
! (negative to ignore convergence) [100]
calcxdens=.false., ! Print (.true.) or do not print (.false.)
! excited-to-excited transition dipole moments [.false.]

!***** Solvent Models and External Electric Fields
solvent_model=0, ! (0) None, (1) Linear response, (2) Vertical excitation,
! or (3) State-specific [0]
potential_type=1, ! (1) COSMO or (2) Onsager [1]
onsager_radius=2, ! Onsager radius, A (system dependent) [2]
ceps=10, ! Dielectric constant, unitless [10]
linmixparam=1, ! Linear mixing parameter for vertical excitation
! or state-specific SCF calculation [1]
cosmo_scf_ftol=1.0d-5, ! Vertical excitation or state-specific
! SCF tolerance, eV [1.0d-5]
doZ=.false., ! Use relaxed (.true.) or unrelaxed (.false) density for
! vertical excitation or state-specific COSMO or Onsager [.false.]
EF=0, ! (0) None or (1) Electric field in ground- and excited-state [0]
Ex=0, ! Electric field vector X, eV/A [0]
Ey=0, ! Electric field vector Y, eV/A [0]
Ez=0, ! Electric field vector Z, eV/A [0]
&endqmmm

&moldyn
!***** General Parameters
natoms=48, ! Number of atoms
! (must be equal to number of atoms in system)
rnd_seed=1646777, ! Seed for the random number generator
bo_dynamics_flag=0, ! (0) Non-BO or (1) BO [1]
exc_state_init=0, ! Initial excited state (0 - ground state) [0]
n_exc_states_propagate=0, ! Number of excited states [0]

!***** Dynamics Parameters
time_init=0.0, ! Initial time, fs [0.0]
time_step=0.1, ! Time step, fs [0.1]
n_class_steps=13000, ! Number of classical steps [1]
n_quant_steps=0, ! Number of quantum steps for each classical step [4]
moldyn_deriv_flag=1, ! (0) None, (1) Analytical, or (2) Numerical [1]
num_deriv_step=1.0d-3, ! Displacement for numerical derivatives, A [1.0d-3]
rk_tolerance=1.0d-6, ! Tolerance for the Runge-Kutta propagator [1.0d-7]

```

```

!***** Non-Adiabatic Parameters
decoher_type=0, ! Type of decoherence: Reinitialize (0) Never,
! (1) At successful hops, (2) At successful plus frustrated hops...
dotrivial=0, ! Do unavoided (trivial) crossing routine (1) or not (0) [1]
quant_step_reduction_factor=1d0, ! Quantum step reduction factor [2.5d-2]

!***** Thermostat Parameters
therm_type=1, ! Thermostat type: (0) Newtonian, (1) Langevin,
therm_temperature=300, ! Thermostat temperature, K [300]
therm_friction=20, ! Thermostat friction coefficient, 1/ps [20]

!***** Output & Log Parameters
verbosity=3, ! NEXMD output verbosity (0-minimum, 3-maximum)
! [2 for dynamics, 3 for optimization and single-point]
out_data_steps=1, ! Number of steps to write data [1]
out_coords_steps=10, ! Number of steps to write the restart file [10]
out_data_cube=0, ! Write (1) or do not write (0) view files to generate cubes [0]
out_count_init=0, ! Initial count for view files [0]
&endmoldyn

```

```

&coord
6      3.131709      8.332442      0.100000
6      1.937213      7.605170      0.100000
6      1.976913      6.207191      0.100000
6      3.197970      5.536932      0.100000
6      4.410713      6.261148      0.100000
6      4.357637      7.672338      0.100000
6      9.204661      5.038817      0.100000
6      7.984745      4.335425      0.100000
6      8.007159      2.922590      0.100000
6      9.221881      2.240922      0.100000
6      10.428072      2.937377      0.100000
6      10.433857      4.350896      0.100000
6      5.660732      5.589764      0.100000
6      6.744042      5.025133      0.100000
6      11.666065      5.054684      0.100000
6      12.744154      5.631577      0.100000
6      15.240495      8.401751      0.100000
6      14.029349      7.727122      0.100000
6      13.984876      6.313902      0.100000
6      15.209778      5.606925      0.100000
6      16.421933      6.281927      0.100000
6      16.465842      7.695478      0.100000
6      17.698919      8.390586      0.100000
6      18.757322      9.003161      0.100000
6      21.205946      11.821117      0.100000
6      19.998397      11.127557      0.100000
6      19.984024      9.714690      0.100000
6      21.217490      9.025971      0.100000
6      22.418977      9.729878      0.100000
6      22.420581      11.128212      0.100000
1      3.108442      9.424099      0.100000
1      0.978315      8.127047      0.100000
1      1.047159      5.634373      0.100000
1      3.230506      4.446231      0.100000
1      5.291945      8.235746      0.100000
1      9.197124      6.129267      0.100000
1      7.062414      2.377802      0.100000
1      9.228613      1.149227      0.100000
1      11.379267      2.403675      0.100000
1      15.257971      9.492609      0.100000
1      13.091804      8.284915      0.100000
1      15.192787      4.515961      0.100000

```

&amp;endcoord

[illegible]

|      |      |
|------|------|
| 0.00 | 0.00 |
| 0.00 | 0.00 |
| 0.00 | 0.00 |

```
0.00 0.00
0.00 0.00
0.00 0.00
0.00 0.00
0.00 0.00
&endcoeff
```
